# Supplementary material for: Addressing Mental Health Needs: Perspectives of African Americans Living in the Rural South
Source: Atypon-hosted journal article supplement (doi:10.1176/appi.ps.201600208), 2017-02-01
Supplement: appi.ps.201600208.ds001.pdf [file appi.ps.201600208.ds001.pdf]

## Focus Group Guides

What comes to mind when you hear the term *emotional wellness*?

What is important for *emotional wellness* in your community?

- Access to counseling/care?
- Access to medicine?
- Employment?
- Housing?
- Spiritual well-being?
- Physical well-being?

What is happening now in your community around *emotional wellness*?

What should be done about *emotional wellness* in your community?

- Improve access to care?
- Improve access to medicine?
- Community interventions/support?
- Who should be doing what?
- Is there anything you could be doing?

What comes to mind when you hear the term *mental illness*?

What's happening now in your community around *mental illness*?

What would you say the *mental illness* needs of this community are?

- Access to counseling/care?
- Access to medicine?
- Employment?
- Housing?
- Spiritual?
- Physical?

What should be done about *mental illness* in your community?

- Improve access to care?
- Improve access to medicine?
- Community or campus interventions/support ?
- Who should be doing what?
- Is there anything that you could be doing?

Looking back on our discussion today, what would you call the main issue or problem we have been talking about?
